# Supplementary material for: Systemic Treatment of Immune-Mediated Keratoconjunctivitis Sicca with Allogeneic Stem Cells Improves the Schirmer Tear Test Score in a Canine Spontaneous Model of Disease
Source: MDPI journal article supplement (doi:10.3390/jcm10245981), 2021-12-20
Supplement: s1 [file s1]

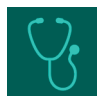

Table S1: Basal biochemistry and haematological data in the cATMSCs group.

| Animals (n = 14)                          | Reference values            | Mean $\pm$ SD                   |
|-------------------------------------------|-----------------------------|---------------------------------|
| Haematocrit (%)                           | 37.00 - 55.00               | 49.85 $\pm$ 8.12                |
| Haemoglobin (g/dl)                        | 12.00 - 18.00               | 16.42 $\pm$ 2.84                |
| Erythrocytes (units/ $\mu$ l)             | 5,500,000.00 - 8,500,000.00 | 6,674,615.38 $\pm$ 1,045,543.04 |
| MCV (fl)                                  | 60.00 - 77.00               | 74.70 $\pm$ 3.52                |
| MCH (pg)                                  | 19.00 - 25.00               | 24.56 $\pm$ 1.01                |
| MCHC (g/dl)                               | 32.00 - 36.00               | 32.89 $\pm$ 1.22                |
| Platelets (units/ $\mu$ l)                | 200,000.00 - 500,000.00     | 267,083.33 $\pm$ 75,883.23      |
| Leucocytes (units/ $\mu$ l)               | 6,000 - 17,000              | 8,580.77 $\pm$ 3,009.62         |
| Eosinophils (%)                           | 0.00 - 10.00                | 4.15 $\pm$ 2.34                 |
| Basophils (%)                             | 0.00 - 1.00                 | 0.15 $\pm$ 0.38                 |
| Lymphocytes (%)                           | 12.00 - 30.00               | 18.92 $\pm$ 5.33                |
| Monocytes (%)                             | 3.00 - 10.00                | 5.31 $\pm$ 2.84                 |
| Bands (%)                                 | 0.00 - 3.00                 | 0.00 $\pm$ 0.00                 |
| Segmented (%)                             | 60.00 - 77.00               | 71.46 $\pm$ 6.63                |
| Eosinophils (units/ $\mu$ l)              | 100.00 - 1,250.00           | 353.57 $\pm$ 205.55             |
| Basophils (units/ $\mu$ l)                | 0.00 - 200.00               | 9.7 $\pm$ 23.71                 |
| Lymphocytes (units/ $\mu$ l)              | 1,000.00 - 4,800.00         | 1,598.96 $\pm$ 662.75           |
| Monocytes (units/ $\mu$ l)                | 150.00 - 1,350.00           | 438.45 $\pm$ 238.32             |
| Bands (units/ $\mu$ l)                    | 0.00 - 300.00               | 0.00 $\pm$ 0.00                 |
| Segmented (units/ $\mu$ l)                | 3,000.00 - 11,500.00        | 6,180.08 $\pm$ 2,344.80         |
| Reticulocytes (%)                         | 0.50 - 2.00                 | 0.72 $\pm$ 0.33                 |
| Reticulocytes ( $10^3/\text{mm}^3$ )      | (0.00 - 70.00)              | 53.95 $\pm$ 24.07               |
| Ultra-sensitive C-reactive protein (mg/l) | < 0.15                      | 0.05 $\pm$ 0.03                 |
| Creatinine/Serum (mg/dl)                  | < 1.80                      | 0.92 $\pm$ 0.15                 |
| Total protein/Serum (g/l)                 | 54.00 - 71.00               | 69.36 $\pm$ 6.10                |
| Total globulin/Serum (g/l)                | 15.00 - 35.00               | 37.57 $\pm$ 7.65                |
| Albumin/Serum (g/l)                       | 25.00 - 40.00               | 31.79 $\pm$ 4.28                |
| Albumin/Globulin ratio                    |                             | 0.89 $\pm$ 0.22                 |
| Gamma-GT (U/l)                            | < 15.00                     | 9.17 $\pm$ 9.77                 |
| Alkaline phosphatase/Serum (U/l)          | < 200.00                    | 84.64 $\pm$ 106.63              |

cAdMSC, canine adipose-tissue derived mesenchymal stem cell; MCH, mean corpuscular haemoglobin; MCHC, mean cell haemoglobin concentration; MCV, mean corpuscular volume; SD, standard deviation.

Table S2: STT values at Day 0, 15, 45 and 180 in the cATMSCs group.

| Eye   | STT   |     |      |      |      |         | Treatment  |
|-------|-------|-----|------|------|------|---------|------------|
|       | D -15 | D 0 | D 15 | D 30 | D 45 | D 180   | After D180 |
| A001R | 10    | 14  | 17   | 12   | 14   | 20      | Hylo Gel®  |
| A001L | 15    | 13  | 15   | 11   | 16   | 18      | Hylo Gel®  |
| A002R | 13    | 13  | 19   | 9    | 16   | 21      | Hylo Gel®  |
| A002L | 13    | 14  | 19   | 12   | 14   | 21      | Hylo Gel®  |
| A003R | 20    | 13  | 13   | 23   | 21   | 21      | Hylo Gel®  |
| A003L | 13    | 12  | 20   | 23   | 23   | 23      | Hylo Gel®  |
| A004R | 8     | 12  | 16   | 15   | 5    | 14      | Hylo Gel®  |
| A004L | 11    | 14  | 17   | 13   | 16   | 21      | Hylo Gel®  |
| A005R | 0     | 10  | 8    | 8    | 8    | No data | No data    |
| A005L | 0     | 6   | 4    | 5    | 5    | No data | No data    |
| A007R | 11    | 11  | 10   | 12   | 16   | 18      | Hylo Gel®  |
| A007L | 9     | 11  | 13   | 9    | 10   | 17      | Hylo Gel®  |
| B002R | 11    | 8   | 10   | 4    | 6    | No data | CsA        |
| B002L | 10    | 7   | 10   | 4    | 4    | No data | CsA        |
| B003R | 16    | 9   | 16   | 16   | 18   | No data | CsA        |
| B003L | 8     | 5   | 8    | 8    | 7    | No data | CsA        |
| B004R | 9     | 7   | 8    | 13   | 12   | No data | CsA        |
| B004L | 8     | 7   | 7    | 13   | 13   | No data | CsA        |
| B005L | 17    | 7   | 10   | 15   | 13   | No data | CsA        |
| B006R | 5     | 5   | 5    | 5    | 5    | No data | CsA        |
| B006L | 10    | 9   | 9    | 9    | 10   | No data | CsA        |

cAdMSC, canine adipose tissue-derived mesenchymal stem cell; CsA, cyclosporine A; D, day; STT, Schirmer Tear Test.

Table S3: STT values at Day 0 and 180 in the control group.

| Eye    | STT |       | Treatment       |
|--------|-----|-------|-----------------|
|        | D 0 | D 180 | After D180      |
| CTR01L | 12  | 14    | CsA + Hylo Gel® |
| CTR01R | 13  | 14    | CsA + Hylo Gel® |
| CTR02L | 14  | 15    | CsA + Hylo Gel® |
| CTR02R | 12  | 13    | CsA + Hylo Gel® |
| CTR03L | 13  | 15    | CsA + Hylo Gel® |
| CTR03R | 11  | 16    | CsA + Hylo Gel® |
| CTR04L | 14  | 16    | CsA + Hylo Gel® |
| CTR04R | 12  | 11    | CsA + Hylo Gel® |
| CTR05L | 9   | 6     | CsA + Hylo Gel® |
| CTR05R | 7   | 6     | CsA + Hylo Gel® |
| CTR06L | 5   | 6     | CsA + Hylo Gel® |
| CTR06R | 7   | 8     | CsA + Hylo Gel® |
| CTR07L | 10  | 8     | CsA + Hylo Gel® |
| CTR07R | 9   | 7     | CsA + Hylo Gel® |
| CTR08L | 10  | 9     | CsA + Hylo Gel® |
| CTR08R | 10  | 12    | CsA + Hylo Gel® |
| CTR09L | 1   | 0     | CsA + Hylo Gel® |
| CTR09R | 3   | 2     | CsA + Hylo Gel® |
| CTR10L | 8   | 9     | CsA + Hylo Gel® |
| CTR10R | 5   | 4     | CsA + Hylo Gel® |
| CTR11L | 5   | 4     | CsA + Hylo Gel® |
| CTR11R | 7   | 8     | CsA + Hylo Gel® |
| CTR12L | 6   | 8     | CsA + Hylo Gel® |
| CTR12R | 6   | 3     | CsA + Hylo Gel® |
| CTR13L | 7   | 4     | CsA + Hylo Gel® |
| CTR13R | 8   | 8     | CsA + Hylo Gel® |
| CTR14L | 2   | 0     | CsA + Hylo Gel® |
| CTR14R | 7   | 5     | CsA + Hylo Gel® |

CsA, cyclosporine A; D, day; STT, Schirmer Tear Test
